# Supplementary material for: The Multifunctionally Graded System for a Controlled Size Effect on Iron Oxide–Gold Based Core-Shell Nanoparticles
Source: MDPI journal article supplement (doi:10.3390/nano11071695), 2021-06-28
Supplement: s1 [file s1]

# The Multifunctionally Graded System for a Controlled Size Effect on Iron Oxide–Gold Based Core-Shell Nanoparticles

Bo-Wei Du <sup>1</sup>, Chih-Yuan Chu <sup>1</sup>, Ching-Chang Lin <sup>2</sup> and Fu-Hsiang Ko <sup>1,\*</sup>

<sup>1</sup> Department of Materials Science and Engineering, National Yang Ming Chiao Tung University, Hsinchu 30010, Taiwan; duu.mse04g@nctu.edu.tw (B.-W.D.); dv8962@hotmail.com (C.-Y.C.);

<sup>2</sup> Research Center for Advanced Science and Technology (RCAST), The University of Tokyo, 4-6-1 Komaba, Meguro-ku, Tokyo 153-8904, Japan; Lin@dsc.rcast.u-tokyo.ac.jp

\* Correspondence: fhko@mail.nctu.edu.tw; Tel.: +886-35712121 ext: 55803

## Table of Contents:

Table S1. The IC<sub>50</sub> of Fe<sub>3</sub>O<sub>4</sub>@Au-dsDNA/DOX for HeLa and MCF-7 cells.

Figure S1. Calibration curve of the fluorescence and DOX fluorescence intensity as a function of the DOX and DNA concentration. The plot of  $\log(F_0 - F)/F$  as a function of  $\log[\text{DNA}]$  was used to calculate the number of bound DOX molecules ( $n$ ) per DNA.

Figure S2. Relationship between the percentage released after applying HFME for 20 min.

**Table S1.** The IC50 of Fe<sub>3</sub>O<sub>4</sub>@Au-dsDNA/DOX for HeLa and MCF-7 cells.

| Diameter (nm) | IC50-HeLa Cell (μM) | IC50-MCF-7 Cell (μM) |
|---------------|---------------------|----------------------|
| 25.9          | 1.6                 | 1.3                  |
| 33.1          | 1.3                 | 1.0                  |
| 39.5          | 1.4                 | 1.1                  |
| 47.7          | 1.3                 | 1.1                  |
| 59.5          | 1.6                 | 1.2                  |

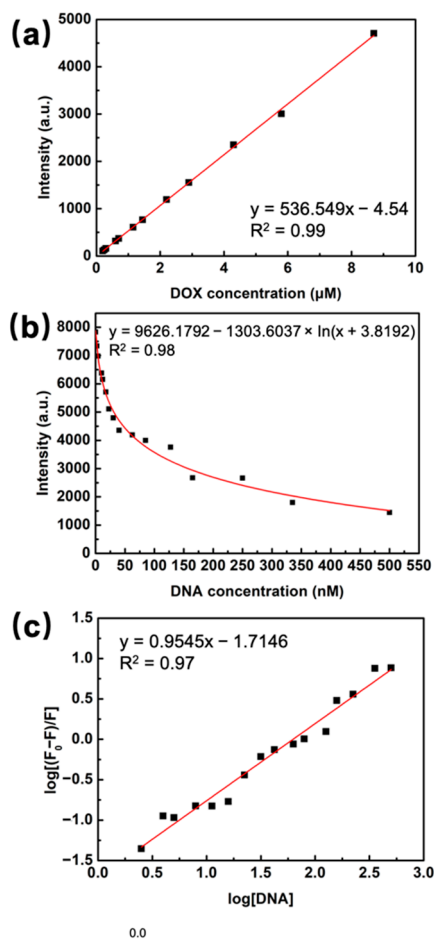

**Figure S1.** (a) Calibration curve of the fluorescence intensity as a function of the DOX concentration. (b) Calibration curve of the DOX fluorescence intensities as a function of the DNA concentrations. (c) The plot of  $\log(F_0 - F)/F$  as a function of  $\log[DNA]$  was used to calculate the number of bound DOX molecules ( $n$ ) per DNA.

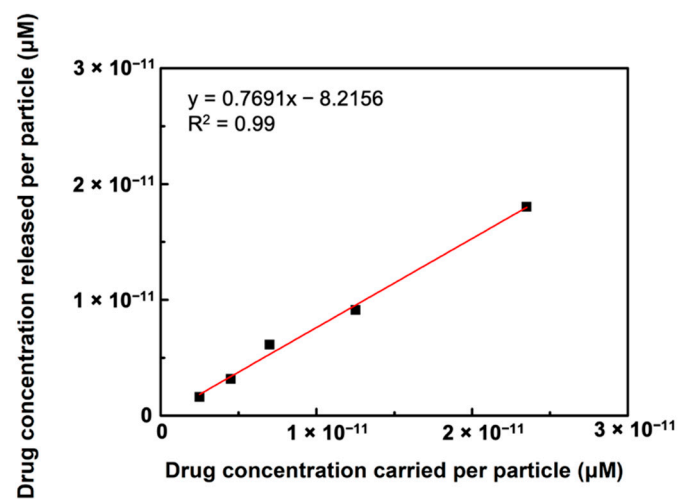

**Figure S2.** Relationship between the percentage released after applying HFME for 20 min.
